# Supplementary material
Source: HighWire-hosted journal article supplement (https://erj.ersjournals.com/content/59/6/2200653)

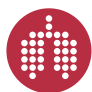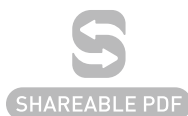

# The curious incident of long COVID symptoms, from an imaginary condition to a recognised syndrome: a “small victory”

Valentina E. Di Mattei<sup>1,2</sup>, Gaia Perego <sup>3</sup>, Francesca Milano<sup>2</sup>, Thomas Eric Hill<sup>4</sup> and Sergio Alfonso Harari <sup>5,6</sup>

<sup>1</sup>School of Psychology, Vita-Salute San Raffaele University, Milan, Italy. <sup>2</sup>Clinical and Health Psychology Unit, IRCCS San Raffaele Scientific Institute, Milan, Italy. <sup>3</sup>Department of Psychology, University of Milano-Bicocca, Milan, Italy. <sup>4</sup>School of Medicine, Vita-Salute San Raffaele University, Milan, Italy. <sup>5</sup>Department of Clinical Sciences and Community Health, University of Milan, Milan, Italy. <sup>6</sup>Department of Medicine, MultiMedica IRCCS, Milan, Italy.

Corresponding author: Gaia Perego ([g.perego23@campus.unimib.it](mailto:g.perego23@campus.unimib.it))

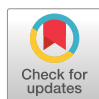

Shareable abstract (@ERSpublications)

**In the early stages of the pandemic, patients with a post-COVID condition felt ignored and disbelieved by their doctors and relatives. Given the importance of the doctor-patient relationship in post-COVID management, we recommend “relationship-based care”.** <https://bit.ly/3vQ9R01>

**Cite this article as:** Di Mattei VE, Perego G, Milano F, *et al.* The curious incident of long COVID symptoms, from an imaginary condition to a recognised syndrome: a “small victory”. *Eur Respir J* 2022; 59: 2200653 [DOI: 10.1183/13993003.00653-2022].

This single-page version can be shared freely online.

Copyright ©The authors 2022.

This version is distributed under the terms of the Creative Commons Attribution Non-Commercial Licence 4.0. For commercial reproduction rights and permissions contact [permissions@ersnet.org](mailto:permissions@ersnet.org)

Received: 28 March 2022  
Accepted: 19 April 2022

*To the Editor:*

Over the past 2 years, the scientific community has acquired a better understanding about coronavirus disease 2019 (COVID-19) as an acute disease, but there is still much to learn, especially when considering the chronic aspects of this illness. In the early stages of the pandemic, healthcare workers focused on acute COVID-19 symptoms, often overlooking its long-term and chronic implications. In October 2021, the World Health Organization recognised these long-term complications as long COVID syndrome, which probably affected more than 62% of patients [1]. Patients with long COVID syndrome experienced the fear of living forever with those symptoms, arising from the lack of medical information on this issue [2], combined with the feeling of being ignored and disbelieved. Several patients felt they did not have access to appropriate healthcare, as they perceived that healthcare workers disregarded their symptoms and judged them as unreal, often considering them secondary to psychiatric issues [3].

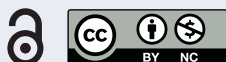

Supplement: inline-supplementary-material-1 [file inline-supplementary-material-1.pdf]
